# Supplementary material for: Genistein Inhibits Prostate Cancer Cell Growth by Targeting miR-34a and Oncogenic HOTAIR
Source: PLoS One. 2013 Aug 1;8(8):e70372. doi: 10.1371/journal.pone.0070372 (PMC3731248; doi:10.1371/journal.pone.0070372)
Supplement: Table S2 — (XLS) [file pone.0070372.s004.xls]

## Sheet: Table S2
Table S2. Pathways regulated by the targets of genistein (KEGG annotation).
Namber of Genes	Pathway ID	KEGG Pathway	p-value	Gene Symbol
22	(KEGG) 05200	Pathways in cancer	7.92895e-05	MMP9,STAT1,PGF,GLI3,RAC2,TPM3,TGFB3,FGF3,
				ITGA2B,PIAS3,SKP2,EGF,FZD9,JUP,FGF11,WNT3,
				TCF7L2,ARNT2,HDAC1,CREBBP,AKT2,CBLB
13	(KEGG) 04144	Endocytosis	0.00481888	HLA-A,F2R,TGFB3,ARAP3,EHD2,DNM3,AGAP2,
				CAV1,EGF,SMAD6,ERBB3,LDLR,CBLB
12	(KEGG) 00010	Glycolysis / Gluconeogenesis	6.2839e-07	ALDOC,PGK1,GALM,ACSS1,PKM2,LDHA,ENO2,
				ENO1,GAPDH,TPI1,PGAM1,LDHAL6A
11	(KEGG) 04110	Cell cycle	0.00245742	SMC1A,CHEK2,TGFB3,CCNB1,CDKN2C,CDC25B,
				SKP2,PLK1,BUB1B,HDAC1,CREBBP
11	(KEGG) 04810	Regulation of actin cytoskeleton	0.0433582	F2R,RAC2,ITGA2B,MYLK2,ITGA5,GSN,EGF,
				PIKFYVE,FGF11,CFL1,FGF3
10	(KEGG) 05160	Hepatitis C	0.00970527	IFNA4,STAT1,STAT2,IFIT1,PIAS3,CLDN3,EGF,
				AKT2,LDLR,CLDN4
10	(KEGG) 04630	Jak-STAT signaling pathway	0.0202177	IFNA4,STAT1,STAT2,LEPR,IL26,PIAS3,IFNE,
				CREBBP,AKT2,CBLB
10	(KEGG) 05016	Huntington's disease	0.0416181	NDUFB4,APAF1,DNAH2,POLR2L,COX6B1,
				POLR2E,CREB3L4,ATP5G3,HDAC1,CREBBP
9	(KEGG) 04666	Fc gamma R-mediated phagocytosis	0.00457456	RAC2,MYO10,DNM3,GSN,FCGR2A,PLA2G4A,
				CFL1,MARCKSL1,AKT2
6	(KEGG) 00620	Pyruvate metabolism	0.00435602	ACAT2,ACSS1,PKM2,LDHA,PC,LDHAL6A
6	(KEGG) 04115	p53 signaling pathway	0.0376601	CCNG2,APAF1,DDB2,CHEK2,CCNB1,GTSE1
6	(KEGG) 04520	Adherens junction	0.0396968	RAC2,LMO7,CTNND1,TCF7L2,CREBBP,SORBS1
6	(KEGG) 03320	PPAR signaling pathway	0.0398025	DBI,FADS2,APOA1,CPT2,SORBS1,ACOX2
6	(KEGG) 05212	Pancreatic cancer	0.0398025	STAT1,PGF,RAC2,TGFB3,EGF,AKT2
5	(KEGG) 00640	Propanoate metabolism	0.00943234	ACAT2,HIBCH,ACSS1,LDHA,LDHAL6A
5	(KEGG) 00270	Cysteine and methionine metabolism	0.0146893	DNMT3B,MAT2A,LDHA,TAT,LDHAL6A
